# Supplementary material for: Maresin conjugates in tissue regeneration-1 suppresses ferroptosis in septic acute kidney injury
Source: PubMed Central journal article supplement (PMC8711186; doi:10.1186/s13578-021-00734-x), 2021-12-27

**A**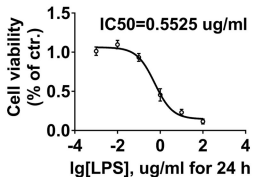**B**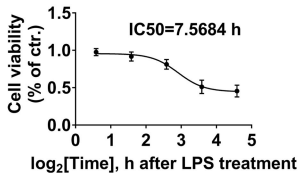**C**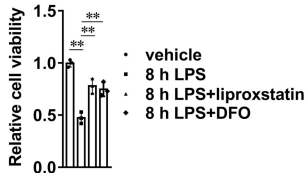**D**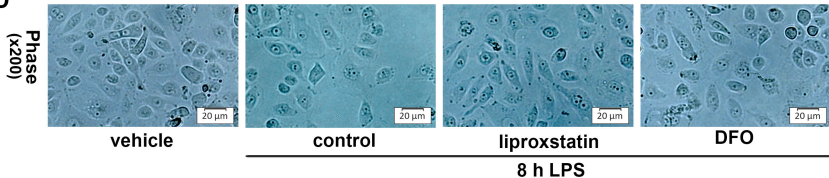

Supplement: 13578_2021_734_MOESM2_ESM.pdf [file 13578_2021_734_MOESM2_ESM.pdf]
