# Supplementary material for: Maresin conjugates in tissue regeneration-1 suppresses ferroptosis in septic acute kidney injury
Source: PubMed Central journal article supplement (PMC8711186; doi:10.1186/s13578-021-00734-x), 2021-12-27

**A**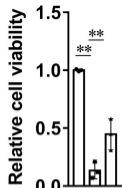

- vehicle
- 24 h erastin
- 24 h erastin+MCTR1

**B**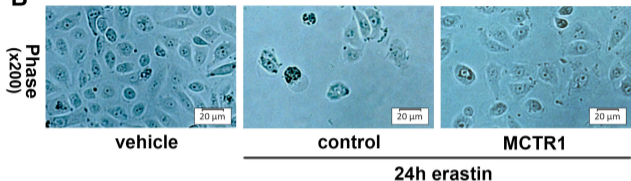**C**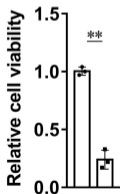

- 24 h erastin+MCTR1+control siRNA
- 24 h erastin+MCTR1+Nrf2 siRNA

**D**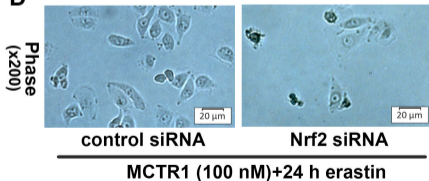

Supplement: 13578_2021_734_MOESM3_ESM.pdf [file 13578_2021_734_MOESM3_ESM.pdf]
